# Supplementary material
Source: bioRxiv or medRxiv preprint supplement (https://www.biorxiv.org/highwire/filestream/52847/field_highwire_adjunct_files/0/176040-1.pdf)
Supplement: Supplementary file [file 176040-1.pdf]

# Supplementary Information

For

## **Environmental fluctuations accelerate molecular evolution of thermal tolerance in a marine diatom**

C.-Elisa Schaum, A. Buckling, N. Smirnov, D. Studholme & G. Yvon-Durocher

Correspondence to: [c.l.schaum@exeter.ac.uk](mailto:c.l.schaum@exeter.ac.uk) or [g.yvon-durocher@exeter.ac.uk](mailto:g.yvon-durocher@exeter.ac.uk)

### **This PDF file includes:**

Figures:

Fig S1: Experimental Design

Fig S2: Trajectories of population size over the experimental period

Fig S3: Carbon-use efficiency in the lineages evolved under fluctuating warming.

Fig S4: Changes in macromolecular composition and cell size over acclimation and adaptation.

Fig S5: Light response curves for the photochemical efficiency of photosystem II.

Fig S6: Neighbour joining tree SNPS

Fig S7: Neighbour joining tree Phenotypic data

Tables:

Table S1: Summary of traits in ancestral and evolved populations.

Table S2. Model selection on generalized additive mixed effects model (GAMM) fitted to the trajectories of population growth.

Table S3. Model selection on generalized additive mixed effects model (GAMM) fitted to the trajectories of population size.

Table S4. Thermal tolerance curve parameters for the ancestor.

Table S5. Model selection and parameters of thermal tolerance curves of the evolved lineages.

Table S6: Model selection and parameters for the thermal responses of gross photosynthesis and respiration in the ancestor.

Table S7: Model selection and parameters for the thermal response of gross photosynthesis in the evolved lineages.

Table S8: Model selection and parameters for the thermal response of respiration in the evolved lineages.

Table S9: Model selection to determine the effects of selection regime on the carbon use efficiency.

Table S10: Model selection for the light response curves of photochemical efficiency (FRRF data).

Table S11: Model selection for C, N and P content, C:N, C:P, N:P, PPUE, PNUE, Chl:C ratio, size and silicate content, as well as  $\Phi$ PSII at irradiance as in the incubator.

Table S12: PERMANOVA and pairwise comparison for differences between treatments (SNPs)

Table S13: PERMANOVA and pairwise comparison for differences between treatments (Phenotypes)

Table S14: Annotations for genes associated to specific treatments

Table S15: Aligned sequence depths for each sequenced population

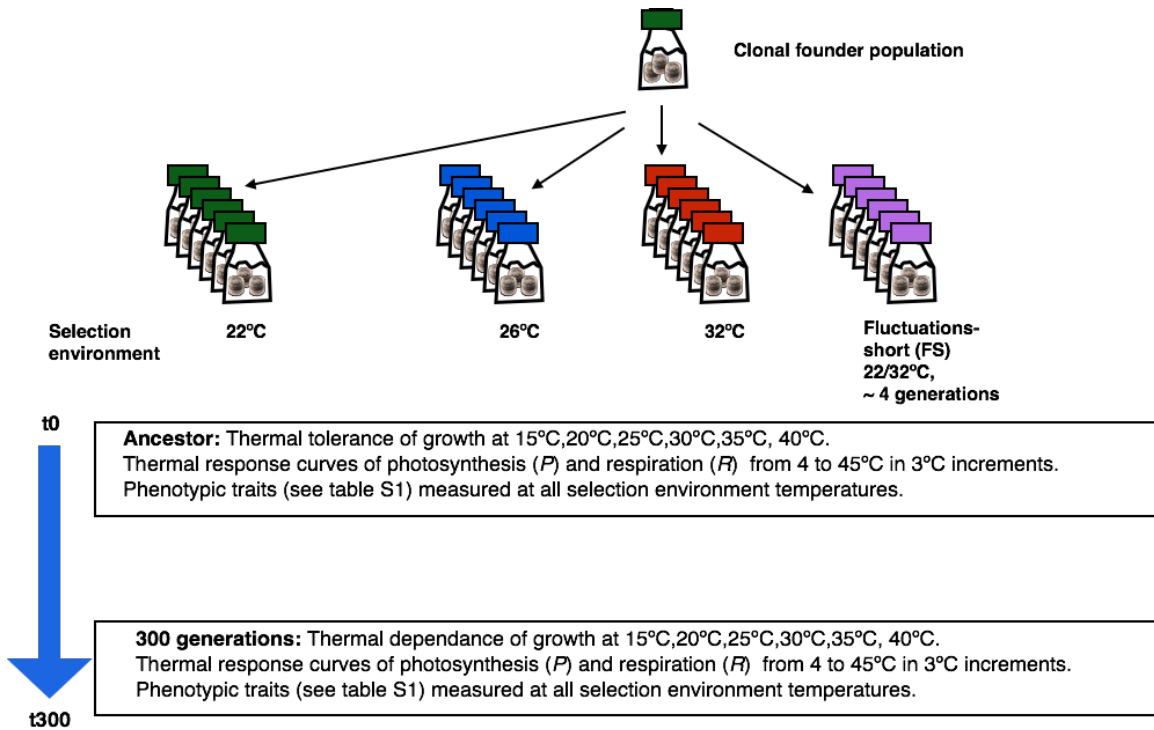

**Figure S1 | Experimental design.** Six biological replicates in four selection regimes (the control environment at 22°C, a moderate warming environment at 26°C, a severe environment at 32°C, and an environment that cycled between 22°C and 32°C approximately every 4 generations “fluctuating – short” or “FS”) were founded from a single clone, and then propagated through semi-continuous batch culture for at least 300 generations. The temperatures for moderate and extreme warming were chosen based on pilot data, which showed that 32°C was past the optimum temperature for growth, but did not induce excessive mortality, and that 26°C represented the predicted average increase in sea surface temperature according to the IPCC RCP4.5 scenario (+ 4°C from ambient). The fluctuating environment represents a conceptually more likely scenario where organisms’ experience only short periods of severe conditions followed by recovery of the benign environment. At the beginning of the experiment (t<sub>0</sub>), and at the end (t<sub>300</sub>), a wide range of metabolic and macromolecular traits were quantified in the ancestor and the evolved lineages (see methods).

**A**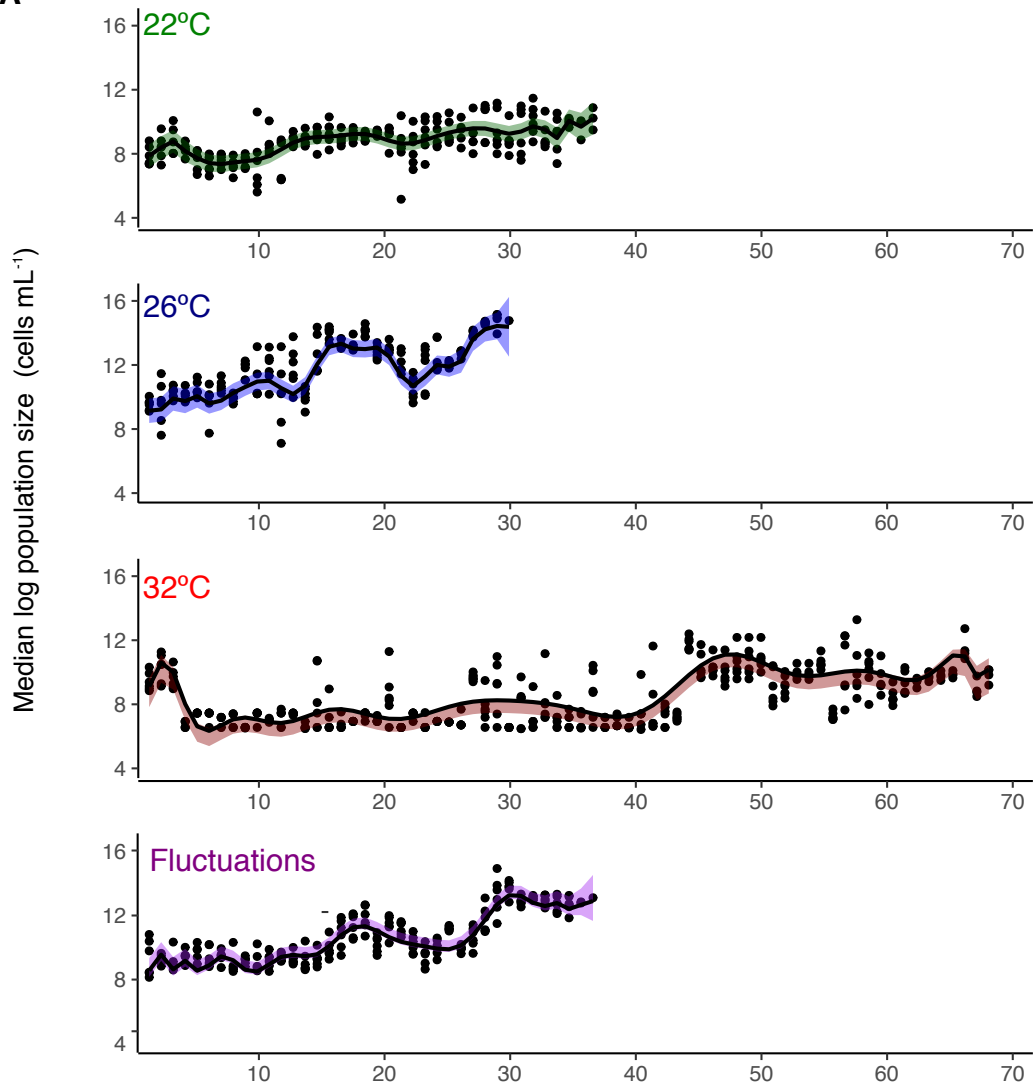**B**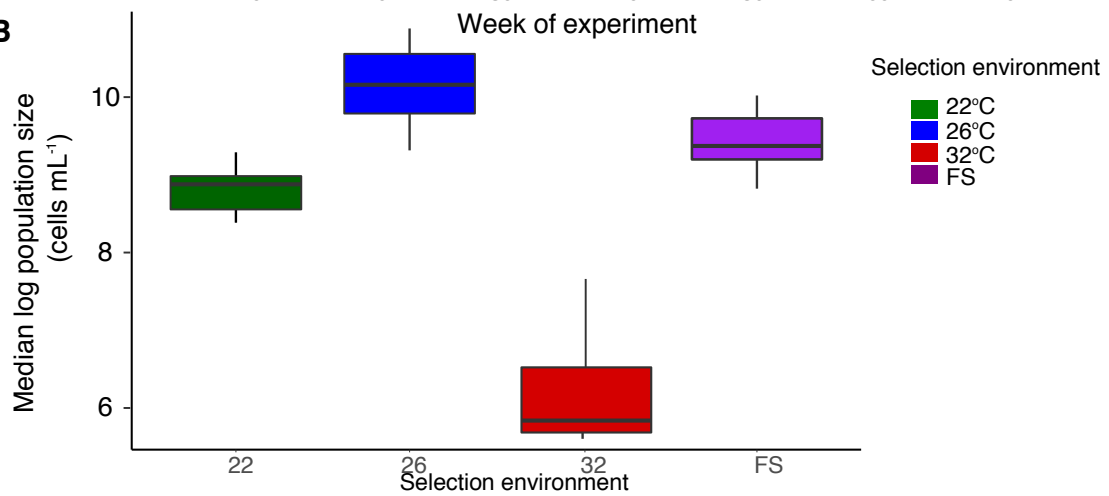

**Figure | S2 Trajectories of population size over the selection experiment. (A)**

Trajectories of population size up to 300 generations determined from the cell density at the end of each transfer. Under moderate warming and in the fluctuating environment, there are rapid, sustained increases in population size. Under severe warming (32°C), population size remained low until evolutionary rescue occurred after approximately 1 year (~ 100 generation). Although all samples received the same size inoculum at each transfer, mutational supply would have been larger in samples that attained higher population densities at the middle of the logarithmic phase of growth. Fitted lines are from the best fits of a GAMM (Table S3). (B) Boxplots of replicate level estimates (fixed and random effects of GAMM ) for median population size for each environment calculated over 300 generations Median population size was highest in samples evolving under moderate warming and in the fluctuating environment, while those at 32°C had the lowest average population size. Green samples are the control at 22°C, blue is 26°C, red is 32°C, and purple is the fluctuating environment.

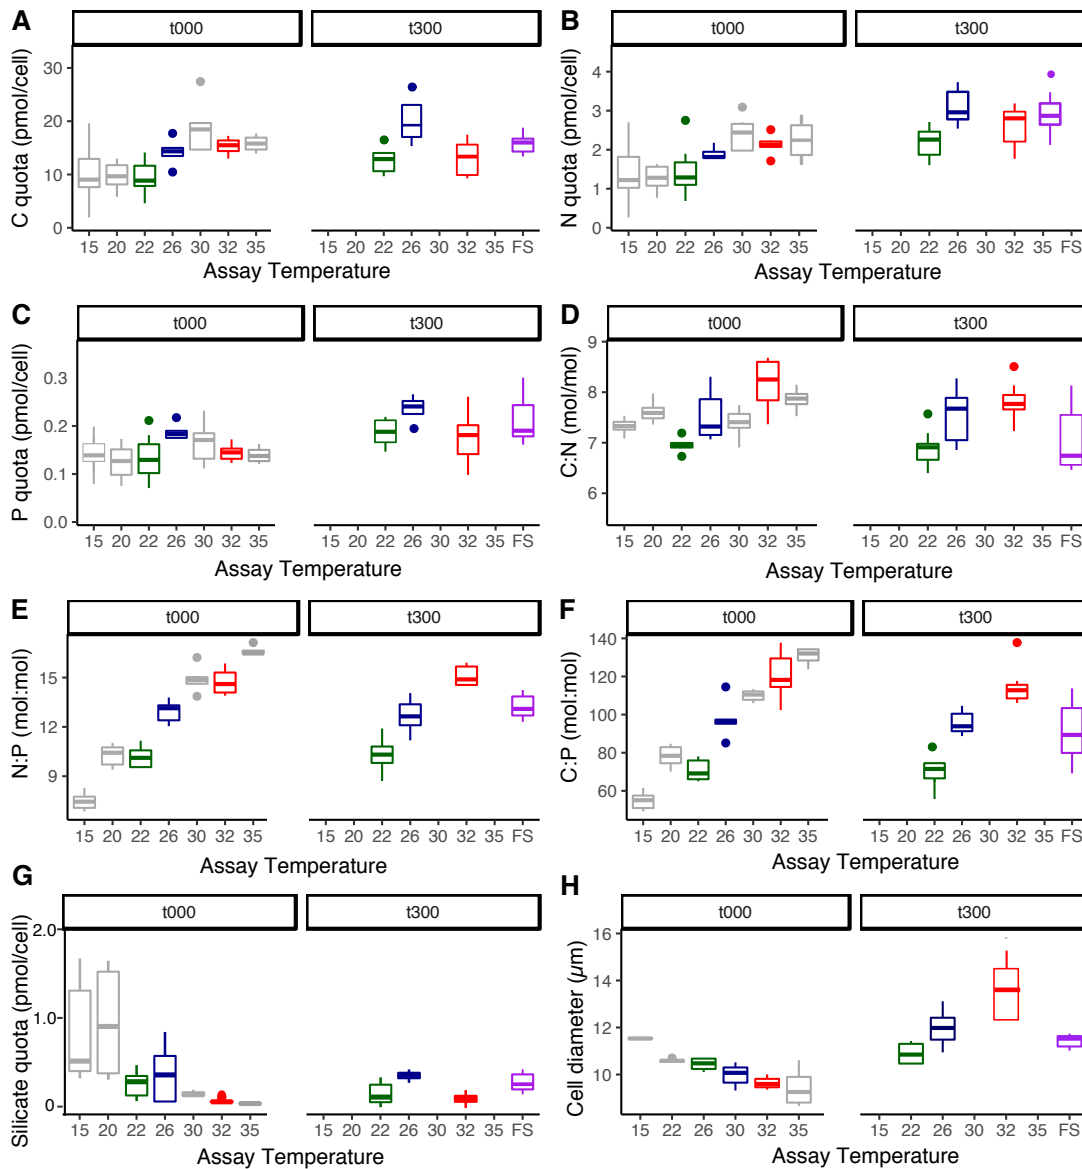

**Figure S3 | Changes in macromolecular composition and cell size over acclimation and adaptation.** Short-term thermal acclimation was investigated by exposing the ancestor at t000 to a 15 to 45°C thermal gradient. The effects of long-term evolutionary adaptation to was quantified after 300 generations in the selection regimes. For elemental composition (C, N, P) and the resulting stoichiometry (C:N, C:P, N:P), the direction of acclimation was the same as that of the evolutionary response (panels A –F). G: Intracellular silicate content decreased with temperature in the short term, but samples at 26°C and FS reestablished silicate contents similar to those of the ancestor and the control after 300 generations. H: Cell size decreased with temperature in the short term, but increased in the long-term, with the largest cells at 32°C, and samples from the FS environment indistinguishable from samples from the 26°C environment. For all boxplots, n=6. Grey denotes ancestor assay temperatures that were not used as selection

regimes. Green for selection and/or assay at 22°C, blue at 26°C, red at 32°C and purple for the fluctuating environment (FS).

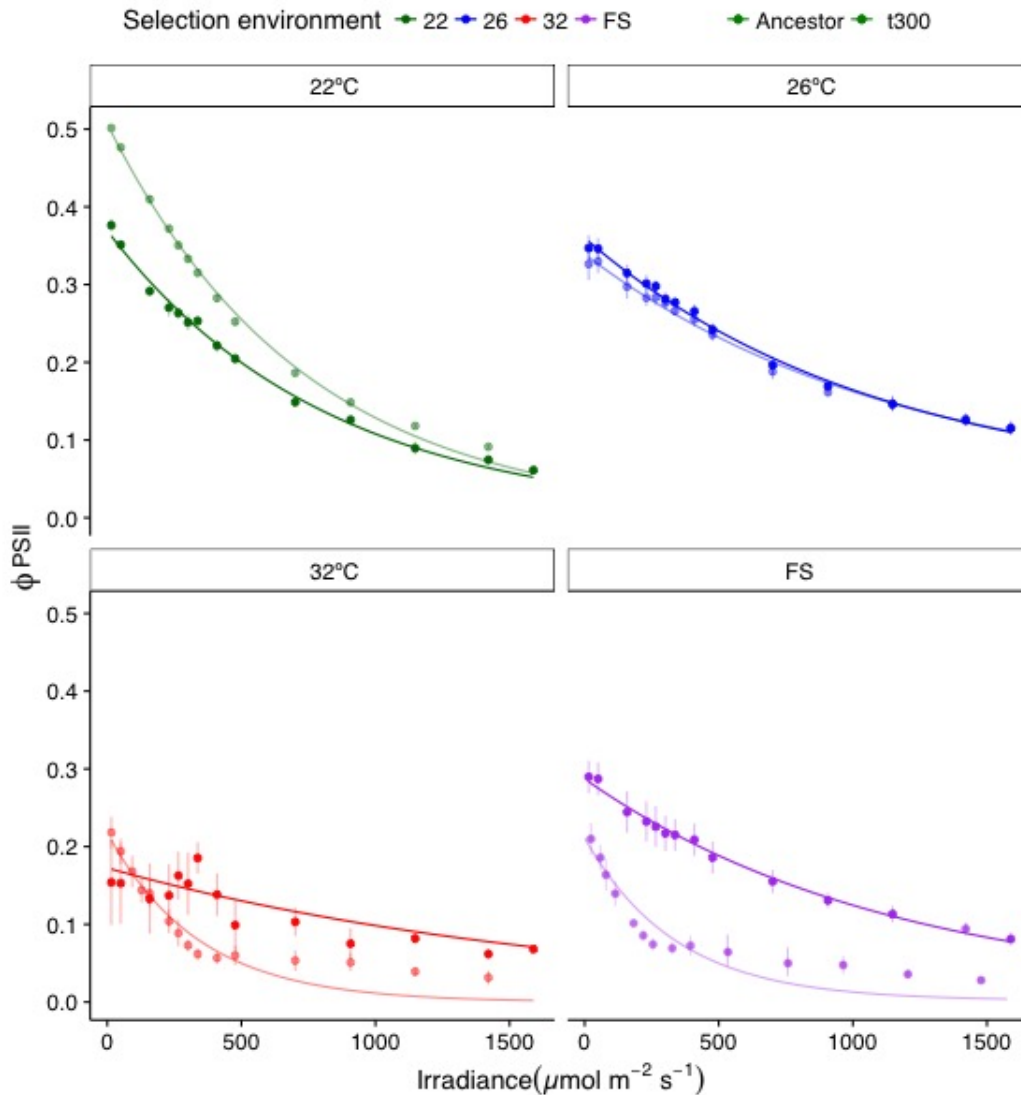

**Figure S4| Light response curves for the photochemical efficiency of photosystem II.**

The light response curves for photochemical efficiency,  $\Phi_{PSII}$ , differed both among selection environments and between the evolved lineages and the ancestor.  $\Phi_{PSII}$  was the highest and declined less steeply with increasing irradiance in the moderate (26°C) and fluctuating warming treatments. Lineages in the severe warming treatment (32°C) had very low photochemical efficiency. Green denotes populations evolved at 22°C, blue for samples evolved at 26°C, red for 32°C, and purple for the fluctuating environment, FS. The ancestor (faded colour) at each temperature is displayed alongside the evolved lineages. All values are means  $\pm$  1s.e.m. The fitted curves are derived from the best fits of a non-linear mixed effects model on Eq. (8).

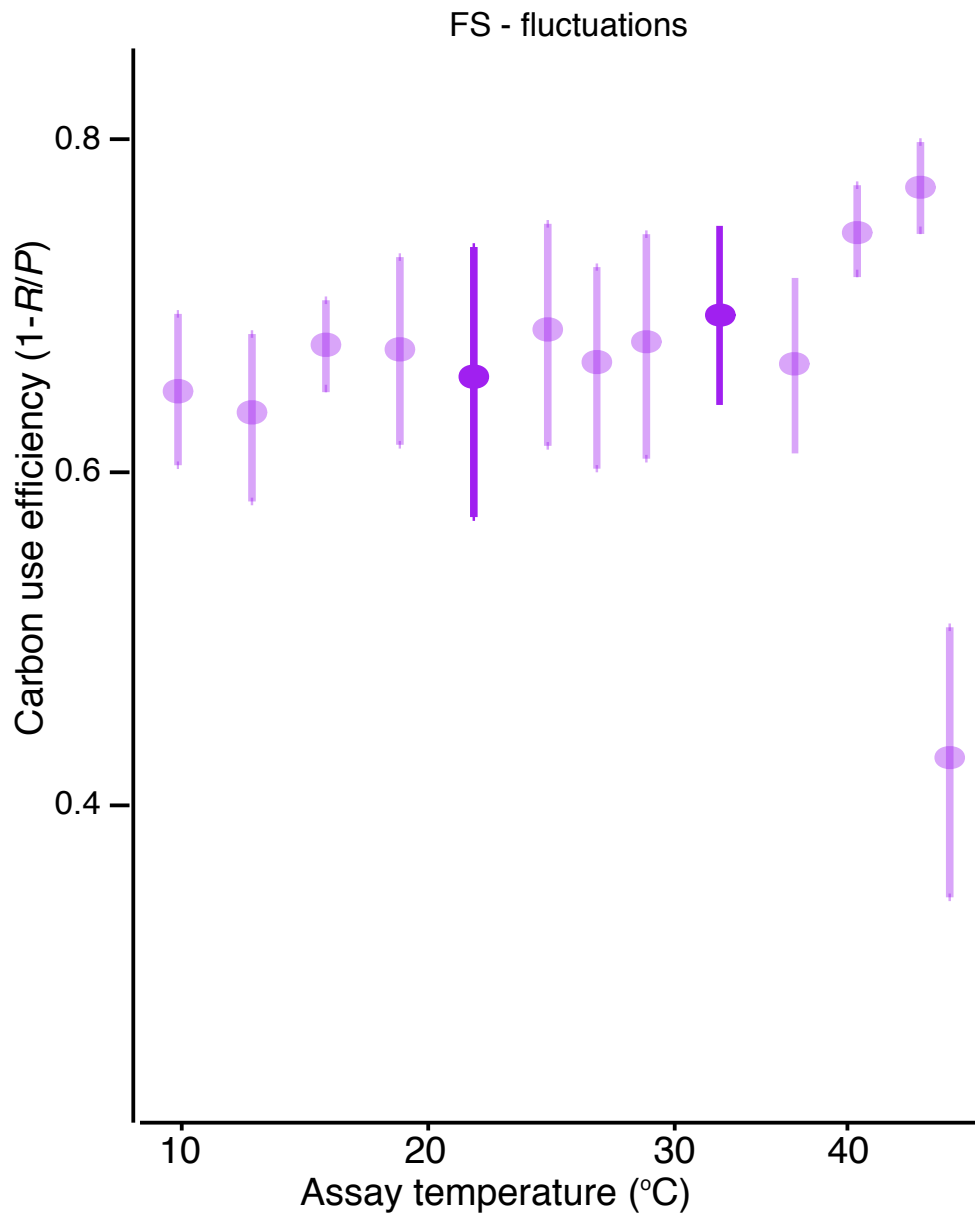

**Figure S5| Carbon-use efficiency in the lineages evolved under fluctuating warming.** Carbon-use efficiency (CUE) in the lineages evolved in the fluctuating environment (between 22 and 32°C) did not differ significantly between assay temperatures spanning 10°C to 35°C. In the main manuscript, we present CUE at 32°C for ease of comparison with the stable 32°C selection environment. 22°C and 32°C are in bold, all other assay temperatures are faded. Data are displayed as means  $\pm$  1 s.e.m.



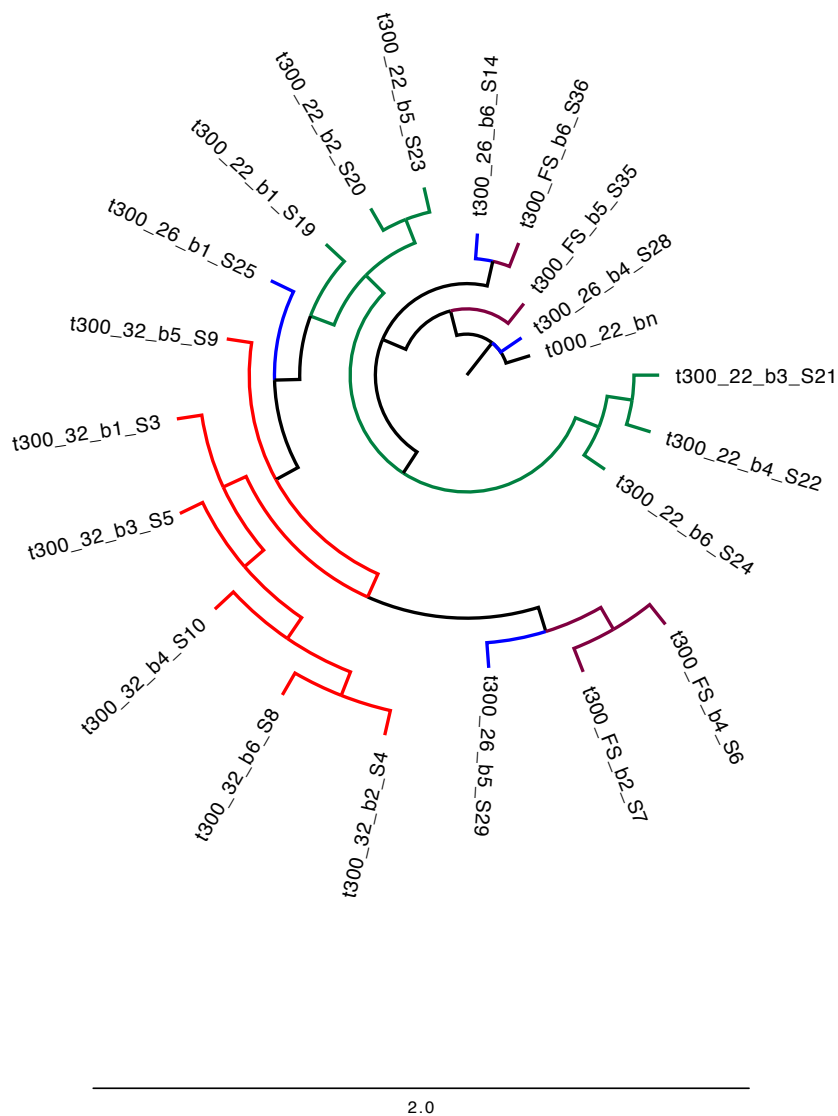

**Figure S6| Neighbour joining tree based on Euclidean distances from frequency and identity of non-synonymous SNPs.** The tree shows clustering of samples evolved at 22°C and 32°C with samples from the 26°C and fluctuating selection regime intertwined with each other. Evolved samples are colour coded based on selection regime with green denoting control (22°C), blue, moderate warming (26°C), red, severe warming (32°C), and purple, evolution in the fluctuating environment. The bar is indicative of the Euclidean distance.

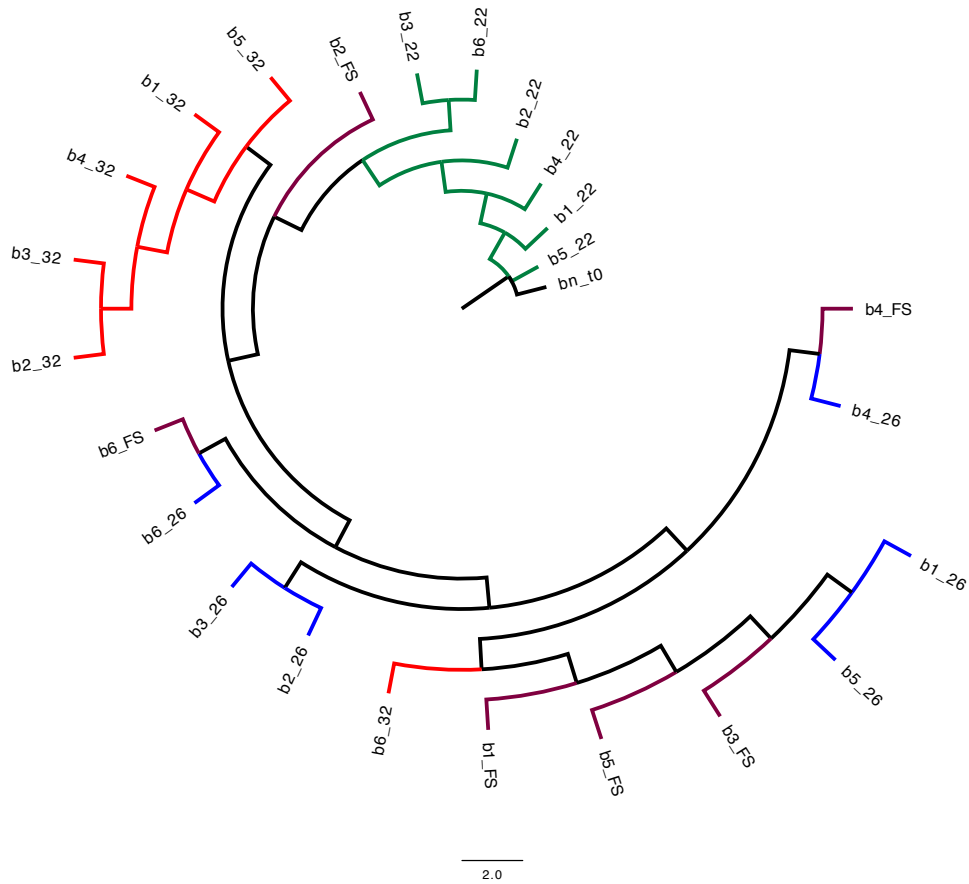

**Figure S7| Neighbour joining tree based on Euclidean distances calculated from phenotypic trait values in the ancestor and evolved samples.** Samples evolved at 22°C cluster with each other and are most similar to the ancestor, whereas samples from the 26°C and fluctuating selection regime intertwined with each other and show a greater distance to the ancestor. Evolved samples are colour coded based on selection regime with green denoting control (22°C), blue, moderate warming (26°C), red, severe warming (32°C), and purple, evolution in the fluctuating environment. The bar is indicative of the Euclidean distance.

**Table S1| Summary of traits in ancestral and evolved populations.** All trait values were measured in the ancestor at 22°C. After 300 generations, they were measured in the evolved samples at the temperature of their selection environment. Responses for samples evolved in the fluctuating treatment were measured at 22°C, 26°C 32°C. For acute responses of FS-evolved lineages (i.e. metabolic traits and their thermal responses), they are displayed for 32°C to aid comparison with the populations experiencing constant severe warming. All data are reported as means  $\pm$  1 s.e.m. Abbreviations and acronyms are used as follows: C for carbon, N for nitrogen, P for phosphate, M, for the assimilation quotient of CO<sub>2</sub>:O<sub>2</sub>, PPUE for phosphate use efficiency (growth per pg phosphate), PNUE for nitrogen use (growth per pg nitrogen), *P* as gross photosynthesis ( $\mu\text{gC } \mu\text{gC}^{-1} \text{d}^{-1}$ ), *R* as respiration ( $\mu\text{gC } \mu\text{gC}^{-1} \text{d}^{-1}$ ), NP as net photosynthesis ( $\mu\text{gC } \mu\text{gC}^{-1} \text{d}^{-1}$ ),  $\Phi_{\text{PSII}}$  as photosynthetic efficiency of PS II at 100 $\mu\text{mol quanta m}^{-2} \text{s}^{-1}$  (approximate light intensity in incubators), CUE as carbon use efficiency (1-*R*/*P*) and the metabolic traits describing the shape of unimodal thermal reaction norms are *E<sub>a</sub>*, *P*(*T<sub>c</sub>*), *R*(*T<sub>c</sub>*), *T<sub>h</sub>*, *E<sub>h</sub>* and *T<sub>opt</sub>*.

|                            |                                        | <b>Ancestor<br/>(at 22°C)</b> | <b>22°C</b>             | <b>26°C</b>             | <b>32°C</b>              | <b>FS</b>               |
|----------------------------|----------------------------------------|-------------------------------|-------------------------|-------------------------|--------------------------|-------------------------|
|                            | <b>Growth rate at t0 or t300</b>       | 0.63 $\pm$ 0.13               | 0.77 $\pm$ 0.06         | 1.36 $\pm$ 0.05         | 0.63 $\pm$ 0.05          | 1.1 $\pm$ 0.08          |
|                            | <b>Geometric mean growth rate</b>      | 0.63 $\pm$ 0.13               | 0.71 $\pm$ 0.08         | 1.08 $\pm$ 0.11         | 0.24 $\pm$ 0.11          | 0.87 $\pm$ 0.12         |
| Cellular<br>traits         | <b>Chl:C</b><br>(mg:mg)                | 0.024 $\pm$ 0.007             | 0.071 $\pm$ 0.002       | 0.121 $\pm$ 0.002       | 0.088 $\pm$ 0.007        | 0.085 $\pm$ 0.007       |
|                            | <b>C:N</b><br>(mol:mol)                | 7.07 $\pm$ 0.07               | 6.94 $\pm$ 0.12         | 7.08 $\pm$ 0.08         | 7.21 $\pm$ 0.14          | 7.18 $\pm$ 0.21         |
|                            | <b>C:P</b><br>(mol:mol)                | 70.78 $\pm$ 2.87              | 69.91 $\pm$ 2.75        | 84.91 $\pm$ 2.21        | 112.93 $\pm$ 3.71        | 93.22 $\pm$ 8.99        |
|                            | <b>N:P</b><br>(mol:mol)                | 10.16 $\pm$ 0.33              | 10.14 $\pm$ 0.39        | 12.75 $\pm$ 0.41        | 15.07 $\pm$ 0.26         | 13.21 $\pm$ 0.55        |
|                            | <b>M</b><br>(CN/CN+2)                  | 0.779                         | 0.778                   | 0.780                   | 0.783                    | 0.782                   |
|                            | <b>C</b> (pmol/cell)                   | 9.97 $\pm$ 1.09               | 13.87 $\pm$ 0.81        | 19.66 $\pm$ 0.82        | 18.37 $\pm$ 1.12         | 19.21 $\pm$ 0.75        |
|                            | <b>N</b> (pmol/cell)                   | 1.41 $\pm$ 0.14               | 1.98 $\pm$ 0.09         | 2.76 $\pm$ 0.13         | 2.53 $\pm$ 0.08          | 2.67 $\pm$ 0.11         |
|                            | <b>P</b> (pmol/cell)                   | 0.139 $\pm$ 0.017             | 0.13 $\pm$ 0.009        | 0.216 $\pm$ 0.008       | 0.168 $\pm$ 0.019        | 0.202 $\pm$ 0.016       |
|                            | <b>Silicate</b> (pmol /cell)           | 0.353 $\pm$ 0.061             | 0.317 $\pm$ 0.025       | 0.346 $\pm$ 0.023       | 0.168 $\pm$ 0.077        | 0.311 $\pm$ 0.02        |
|                            | <b>Volume</b> ( $\mu\text{m}^3$ )      | 3794.25 $\pm$<br>680.96       | 3610.65 $\pm$<br>789.14 | 6359.75<br>$\pm$ 818.17 | 13582.53 $\pm$<br>692.95 | 4643.54 $\pm$<br>673.61 |
| Nutrient use<br>efficiency | <b>PPUE</b>                            | 173.98 $\pm$ 4.06             | 128.16 $\pm$ 2.99       | 180.43 $\pm$ 5.01       | 144.98 $\pm$ 4.18        | 191.04 $\pm$ 4.55       |
|                            | <b>PNUE</b>                            | 7.54 $\pm$ 0.71               | 7.02 $\pm$ 0.9          | 7.87 $\pm$ 1.16         | 5.38 $\pm$ 1.09          | 8.14 $\pm$ 1.51         |
| Metabolic<br>traits        | <b><i>P</i></b>                        | 6.53 $\pm$ 0.30               | 12.86 $\pm$ 3.25        | 2.76 $\pm$ 0.45         | 7.37 $\pm$ 0.45          | 8.00 $\pm$ 1.72         |
|                            | <b><i>R</i></b>                        | 1.6 $\pm$ 0.14                | 3.88 $\pm$ 1.59         | 0.21 $\pm$ 0.06         | 2.10 $\pm$ 0.67          | 1.46 $\pm$ 0.76         |
|                            | <b><i>NP</i></b>                       | 1.70 $\pm$ 0.01               | 2.55 $\pm$ 0.56         | 1.17 $\pm$ 0.17         | 1.58 $\pm$ 0.15          | 2.54 $\pm$ 0.60         |
|                            | <b><math>\Phi_{\text{PSII}}</math></b> | 0.41 $\pm$ 0.005              | 0.27 $\pm$ 0.006        | 0.29 $\pm$ 0.01         | 0.13 $\pm$ 0.04          | 0.24 $\pm$ 0.02         |
|                            | <b>CUE</b>                             | 0.63 $\pm$ 0.12               | 0.71 $\pm$ 0.03         | 0.81 $\pm$ 0.10         | 0.67 $\pm$ 0.03          | 0.73 $\pm$ 0.01         |
| Thermal                    | <b><i>E<sub>a</sub></i></b> (eV)       | 0.36 $\pm$ 0.19               | 0.25 $\pm$ 0.08         | 0.57 $\pm$ 0.1          | 0.57 $\pm$ 0.09          | 0.91 $\pm$ 0.1          |

|                         |                             |                   |                   |                                       |                   |                   |
|-------------------------|-----------------------------|-------------------|-------------------|---------------------------------------|-------------------|-------------------|
| tolerance of growth     | $\mu(T_c)$                  | $-0.47 \pm 0.11$  | $-0.5 \pm 0.11$   | $-0.46 \pm 0.15$                      | $-1.18 \pm 0.16$  | $-1.1 \pm 0.16$   |
|                         | $E_h(\text{eV})$            | $6.11 \pm 2.95$   | $4.8 \pm 0.93$    | $7.32 \pm 1.29$                       | $2.86 \pm 1.28$   | $4.14 \pm 1.29$   |
|                         | $T_h(\text{K})$             | $305.46 \pm 1.77$ |                   | No treatment effect $308.16 \pm 0.35$ |                   |                   |
|                         | $T_{\text{opt}}(\text{°C})$ | $28.69 \pm 0.61$  | $30.89 \pm 0.16$  | $32.14 \pm 0.29$                      | $31.08 \pm 0.62$  | $33.90 \pm 0.92$  |
|                         | $E_a(\text{eV})$            | $1.07 \pm 0.16$   |                   | No treatment effect $0.87 \pm 0.03$   |                   |                   |
| Thermal response of $P$ | $P(T_c)$                    | $-1.83 \pm 0.12$  | $-1.95 \pm 0.15$  | $-3.42 \pm 0.11$                      | $-2.56 \pm 0.13$  | $-3.51 \pm 0.11$  |
|                         | $E_h(\text{eV})$            | $3.51 \pm 0.29$   | $3.24 \pm 0.28$   | $3.17 \pm 0.39$                       | $2.98 \pm 0.36$   | $2.13 \pm 0.36$   |
|                         | $T_h(\text{K})$             | $303.41 \pm 0.94$ | $306.49 \pm 0.55$ | $306.49 \pm 0.55$                     | $306.49 \pm 0.55$ | $306.49 \pm 0.55$ |
|                         | $T_{\text{opt}}(\text{°C})$ | $27.27 \pm 0.7$   | $30.86 \pm 0.02$  | $32.03 \pm 0.01$                      | $31.14 \pm 0.04$  | $33.37 \pm 0.06$  |
|                         | $E_a(\text{eV})$            | $1.07 \pm 0.16$   |                   | No treatment effect $0.83 \pm 0.04$   |                   |                   |
| Thermal response of $R$ | $R(T_c)$                    | $-2.54 \pm 0.13$  | $-2.57 \pm 0.14$  | $-3.92 \pm 0.13$                      | $-2.74 \pm 0.08$  | $-3.84 \pm 0.18$  |
|                         | $E_h(\text{eV})$            | $2.54 \pm 0.14$   | $3.35 \pm 0.46$   | $2.66 \pm 0.6$                        | $2.93 \pm 0.52$   | $1.74 \pm 0.54$   |
|                         | $T_h(\text{K})$             | $305.25 \pm 0.94$ |                   | No treatment effect $307.74 \pm 0.81$ |                   |                   |
|                         | $T_{\text{opt}}(\text{°C})$ | $28.82 \pm 0.36$  | $31.99 \pm 0.01$  | $32.62 \pm 0.62$                      | $31.83 \pm 0.42$  | $33.95 \pm 0.92$  |

**Table S2 | Model selection on generalised additive mixed effects model (GAMM) fitted to the trajectories of population growth.** We fitted a GAMM to test whether the trajectories of population growth differed among the selection regimes. In the model, the effect of ‘treatment’ assesses whether median log-growth rates differ among selection regimes, while s(day.of.exp, by = selection regime) indicates whether the trajectories of growth rate differ among the selection regimes. Models were compared via the small sample-size corrected Akaike Information Criterion (AICc), delta AICc is the difference in AICc score relative to the model with the lowest value (most parsimonious model) and Weight is the relative support for the model. The best fitting models were selected as those returning the lowest AICc score and the highest AICc weight and are highlighted in bold.

**Model selection table**

| formula = mue ~ treatment + s(day.of.exp, by = selection regime, bs='cr'), random = ~1   selection regime/replicate |                  |                                 |                         |           |               |               |              |               |
|---------------------------------------------------------------------------------------------------------------------|------------------|---------------------------------|-------------------------|-----------|---------------|---------------|--------------|---------------|
|                                                                                                                     | <b>Intercept</b> | <b>s(day.of.exp, treatment)</b> | <b>selection regime</b> | <b>df</b> | <b>logLik</b> | <b>AICc</b>   | <b>Delta</b> | <b>Weight</b> |
| <b>4 (full model)</b>                                                                                               | <b>0.71</b>      | <b>+</b>                        | <b>+</b>                | <b>15</b> | <b>276.1</b>  | <b>-525.0</b> | <b>0</b>     | <b>0.87</b>   |
| 2                                                                                                                   | 0.73             | +                               |                         | 12        | 271.99        | -521.2        | 3.80         | 0.13          |
| 1                                                                                                                   | 0.70             |                                 |                         | 4         | -50.26        | 399.0         | 923.93       | 0             |
| 3                                                                                                                   | 0.66             | +                               |                         | 7         | -49.28        | 405.5         | 930.44       | 0             |

**Table S3 | Model selection on generalised additive mixed effects model (GAMM) fitted to the trajectories of population size.** We fitted a GAMM to test whether the trajectories of population size differed among the selection regimes. In the model, the effect of ‘treatment’ assesses whether median log-population size differ among selection regimes, while s(day.of.exp, by = treatment) indicates whether the trajectories of growth population size differ among the selection regimes. Models were compared via the small sample-size corrected Akaike Information Criterion (AICc), delta AICc is the difference in AICc score relative to the model with the lowest value (most parsimonious model) and Weight is the relative support for the model. The best fitting models were selected as those returning the lowest AICc score and the highest AICc weight and are highlighted in bold.

**Model selection table**

|                       | formula = pop size~ treatment + s(day.of.exp, by = selection regime, bs='cr'), random = ~ 1   selection regime/replicate |                          |                  |           |         |        |       |        |
|-----------------------|--------------------------------------------------------------------------------------------------------------------------|--------------------------|------------------|-----------|---------|--------|-------|--------|
|                       | Intercept                                                                                                                | s(day.of.exp, treatment) | selection regime | df        | Log Lik | AICc   | Delta | Weight |
| <b>4 (full model)</b> | 7.018                                                                                                                    | +                        | +                | <b>11</b> | -489.3  | 9809.5 | 0     | 0.927  |
| 2                     | 7.16                                                                                                                     | +                        |                  | 8         | -489.9  | 9814.6 | 5.07  | 0.073  |
| 3                     | 6.905                                                                                                                    |                          |                  | 7         | -493.8  | 9891.4 | 81.88 | 0      |
| 1                     | 6.998                                                                                                                    | +                        |                  | 4         | -494.3  | 9894.4 | 84.92 | 0      |

**Table S4 | Thermal tolerance curve parameters for the ancestor.** The thermal tolerance curve was quantified by fitting Eq. (6) to the growth rates quantified over a temperature gradient from 15°C to 40°C. CI (95%) are the lower and upper 95% confidence intervals.

| Parameter  | Environment | Estimate               | CI (95%) [lower, upper]            |
|------------|-------------|------------------------|------------------------------------|
| $\mu(T_c)$ | 22          | -0.47                  | [-1.12,-0.27]                      |
| $E_a$      | 22          | 0.35                   | [0.31,1.13]                        |
| $E_h$      | 22          | 6.12                   | [6.04,12.11]                       |
| $T_h$      | 22          | 305.46 K or<br>32.31°C | [301.75,309.1] or °C [28.62,36.01] |

**Table S5 | Model selection and parameters of thermal tolerance curves of the evolved lineages.** The mechanistic temperature dependence function (see Eq. (6), also Fig. 1) was fitted to the growth rate quantified over a temperature gradient from 15°C to 40°C for all evolved lineages (see table S4 for analysis of the ancestor). Models included random effects on each of the parameters of Eq. (6) by replicate and ‘selection environment’ as a fixed four level factor on each parameter. Models were compared via the small sample-size corrected Akaike Information Criterion (AICc), delta AICc is the difference in AICc score relative to the model with the lowest value (most parsimonious model) and Weight is the relative support for the model. The best fitting models were selected as those returning the lowest AICc score and the highest AICc weight and are highlighted in bold. In the model output, CI (95%) are the lower and upper 95% confidence intervals.

**Model selection table**

| Model name       | Remove selection environment effect on | K         | AICc          | Delta    | Weight      | Log lik       |
|------------------|----------------------------------------|-----------|---------------|----------|-------------|---------------|
| <b>resl.mix3</b> | $T_h$                                  | <b>18</b> | <b>218.81</b> | <b>0</b> | <b>0.78</b> | <b>-88.65</b> |
| resl.mix7        | $E_h + T_h$                            | 15        | 222.04        | 3.22     | 0.16        | -94.13        |
| resl.mix         | NA - full model                        | 21        | 223.81        | 4.99     | 0.06        | -87.09        |
| resl.mix11       | $E_a + E_h + T_h$                      | 12        | 239.43        | 20.62    | 0           | -106.52       |
| resl.mix6        | $E_a + T_h$                            | 15        | 239.93        | 21.11    | 0           | -103.07       |
| resl.mix4        | $\mu(T_c)$                             | 18        | 242.31        | 23.49    | 0           | -100.39       |
| resl.mix14       | $\mu(T_c) + E_h + T_h$                 | 12        | 243.14        | 24.32    | 0           | -108.37       |
| resl.mix12       | $\mu(T_c) + E_a + E_h$                 | 12        | 250.66        | 31.85    | 0           | -112.13       |
| resl.mix15       | All                                    | 9         | 251.98        | 33.16    | 0           | -116.31       |
| resl.mix2        | $E_h$                                  | 18        | 286.3         | 67.49    | 0           | -122.39       |
| resl.mix13       | $\mu(T_c) + E_a + T_h$                 | 12        | 299.85        | 81.04    | 0           | -136.73       |
| resl.mix10       | $\mu(T_c) + T_h$                       | 15        | 305.06        | 86.25    | 0           | -135.64       |
| resl.mix1        | $E_a$ - no convergence                 |           |               |          |             |               |
| resl.mix5        | $E_a + E_h$ - no convergence           |           |               |          |             |               |

**Model parameters**

| Parameter  | Environment | Estimate | CI (95%) [lower, upper] |
|------------|-------------|----------|-------------------------|
| $\mu(T_c)$ | 22          | -0.5     | [-0.71,-0.29]           |
| $\mu(T_c)$ | 26          | -0.46    | [-0.97,-0.01]           |
| $\mu(T_c)$ | 32          | -1.18    | [-1.69,-0.66]           |
| $\mu(T_c)$ | FS          | -1.1     | [-1.62,-0.57]           |



|            |                     |                        |                                      |
|------------|---------------------|------------------------|--------------------------------------|
| $E_a$ (eV) | 22                  | 0.25                   | [0.11,0.51]                          |
| $E_a$ (eV) | 26                  | 0.57                   | [0.21,0.91]                          |
| $E_a$ (eV) | 32                  | 0.57                   | [0.23, 0.91]                         |
| $E_a$ (eV) | FS                  | 0.91                   | [0.57,1.25]                          |
| $E_h$ (eV) | 22                  | 4.8                    | [2.31,5.85]                          |
| $E_h$ (eV) | 26                  | 7.32                   | [3.28,12.13]                         |
| $E_h$ (eV) | 32                  | 2.86                   | [0.01,6.98]                          |
| $E_h$ (eV) | FS                  | 4.14                   | [0.07,8.90]                          |
| $T_h$      | No treatment effect | 308.16 K or<br>35.01°C | [307.49,308.82] or °C [34.34, 35.67] |

---

**Table S6 | Model selection and parameters for the thermal responses of gross photosynthesis and respiration in the ancestor.** Eq. (6) was fitted to the metabolic rates quantified over a temperature gradient from 7°C to 40°C (3°C increments) for the ancestor using a non-linear mixed effects model. “Flux”, i.e. respiration or photosynthesis, was fitted as a fixed two-level factor to test for differences in thermal responses for photosynthesis (P) and respiration (R), and model selection otherwise proceeded as described above. Models were compared via the small sample-size corrected Akaike Information Criterion (AICc), delta AICc is the difference in AICc score relative to the model with the lowest value (most parsimonious model) and Weight is the relative support for the model. The best fitting models were selected as those returning the lowest AICc score and the highest AICc weight and are highlighted in bold..

| <b>Model selection</b> |                                |          |             |              |               |                |
|------------------------|--------------------------------|----------|-------------|--------------|---------------|----------------|
| <b>Model name</b>      | <b>Remove “flux” effect on</b> | <b>K</b> | <b>AICc</b> | <b>Delta</b> | <b>Weight</b> | <b>Log Lik</b> |
| Mod4                   | <i>E<sub>a</sub></i>           | 8        | 217.19      | 0            | 0.976         | -100.595       |
| Mod2                   | <i>P(T<sub>c</sub>)</i>        | 9        | 225.44      | 8.25         | 0.015         | -103.72        |
| Mod1                   | <i>E<sub>h</sub></i>           | 10       | 227.62      | 10.43        | 0.005         | -103.81        |
| Mod3                   | <i>T<sub>h</sub></i>           | 8        | 229.01      | 11.82        | 0.002         | -106.505       |

  

| <b>Parameters</b>           |                          |                                       |
|-----------------------------|--------------------------|---------------------------------------|
| <b>Parameter</b>            | <b>Estimate</b>          | <b>CI 95% [lower, upper]</b>          |
| <i>E<sub>a</sub></i> (eV)   | 1.07                     | [0.73,1.44]                           |
| <i>P(T<sub>c</sub>)</i>     | -1.83                    | [-2.98,-1.01]                         |
| <i>R(T<sub>c</sub>)</i>     | -2.54                    | [-2.65,-1.59]                         |
| <i>E<sub>h</sub>.P</i> (eV) | 3.51                     | [3.17,4.39]                           |
| <i>E<sub>h</sub>.R</i> (eV) | 2.54                     | [2.35,3.53]                           |
| <i>T<sub>h</sub>.P</i> (K)  | 303.41 (K)<br>or 30.26°C | [301.29,305.9] or °C<br>[28.14,32.8]  |
| <i>T<sub>h</sub>.R</i> (K)  | 305.25 or<br>32.10°C     | [294.88,306.9] or °C<br>[21.73,33.84] |

**Table S7| Model selection and parameters for the thermal response of gross photosynthesis in the evolved lineages.** Eq. (6) was fitted to the metabolic rates quantified over a temperature gradient from 7°C to 40°C (3°C increments) for the evolved lineages using a non-linear mixed effects model. “Selection regime” was fitted as a fixed factor to test for differences in the parameters characterizing the thermal response for photosynthesis among the selection regimes. Models were compared via the small sample-size corrected Akaike Information Criterion (AICc), delta AICc is the difference in AICc score relative to the model with the lowest value (most parsimonious model) and Weight is the relative support for the model. The best fitting models were selected as those returning the lowest AICc score and the highest AICc weight and are highlighted in bold.

**Model selection table**

| Model name     | Remove selection regime effect on | K         | AICc          | Delta    | Weight      | Log Lik        |
|----------------|-----------------------------------|-----------|---------------|----------|-------------|----------------|
| <b>gp.mix6</b> | <b><math>E_a + T_h</math></b>     | <b>14</b> | <b>300.28</b> | <b>0</b> | <b>0.46</b> | <b>-135.21</b> |
| gp.mix11       | $E_a + E_h + T_h$                 | 11        | 302.78        | 2.5      | 0.13        | -139.81        |
| gp.mix15       | All                               | 8         | 303.34        | 3.06     | 0.1         | -143.36        |
| gp.mix3        | $T_h$                             | 17        | 303.61        | 3.33     | 0.09        | -133.43        |
| gp.mix1        | $E_a$                             | 17        | 303.74        | 3.46     | 0.08        | -133.5         |
| gp.mix8        | $P(T_c) + E_a$                    | 14        | 304.08        | 3.81     | 0.07        | -137.11        |
| gp.mix12       | $P(T_c) + E_a + E_h$              | 11        | 305.4         | 5.12     | 0.04        | -141.12        |
| gp.mix7        | $E_h + T_h$                       | 14        | 307.32        | 7.04     | 0.01        | -138.73        |
| gp.mix14       | $P(T_c) + E_h + T_h$              | 11        | 307.72        | 7.44     | 0.01        | -142.28        |
| gp.mix         | NA - full model                   | 20        | 309.34        | 9.06     | 0           | -132.76        |
| gp.mix4        | $P(T_c)$                          | 17        | 309.64        | 9.36     | 0           | -136.45        |
| gp.mix2        | $E_h$                             | 17        | 310.05        | 9.78     | 0           | -136.65        |
| gp.mix13       | $P(T_c) + E_a + T_h$              | 11        | 312.68        | 12.41    | 0           | -144.77        |
| gp.mix5        | $E_a + E_h$ - no convergence      |           |               |          |             |                |
| gp.mix9        | $P(T_c) + E_h$ - no convergence   |           |               |          |             |                |

**Parameters**

| Treatment effect on | Environment         | Estimate | CI (95%)      |
|---------------------|---------------------|----------|---------------|
| $P(T_c)$            | 22                  | -1.95    | [-2.01,-1.12] |
| $P(T_c)$            | 26                  | -3.92    | [-4.09,-2.28] |
| $P(T_c)$            | 32                  | -2.47    | [-3.03,-1.92] |
| $P(T_c)$            | FS                  | -3.84    | [-4.44,-2.42] |
| $E_a$ (eV)          | No treatment effect | 0.87     | [0.81,0.94]   |

|            |                     |                          |                                      |
|------------|---------------------|--------------------------|--------------------------------------|
| $E_h$ (eV) | 22                  | 3.24                     | [2.71, 3.82]                         |
| $E_h$ (eV) | 26                  | 3.17                     | [1.95, 4.55]                         |
| $E_h$ (eV) | 32                  | 2.98                     | [1.74,4.23]                          |
| $E_h$ (eV) | FS                  | 2.13                     | [0.89, 3.41 ]                        |
| $T_h$      | No treatment effect | 306.49 K<br>(or 33.34°C) | [303.42, 307.57] Or °C [30.27,34.42] |

---

**Table S8 | Model selection and parameters for the thermal response of respiration in the evolved lineages.** Eq. (6) was fitted to the metabolic rates quantified over a temperature gradient from 7°C to 40°C (3°C increments) for the evolved lineages using a non-linear mixed effects model. “Selection regime” was fitted as a fixed factor to test for differences in the parameters characterizing the thermal response for respiration among the selection regimes. Models were compared via the small sample-size corrected Akaike Information Criterion (AICc), delta AICc is the difference in AICc score relative to the model with the lowest value (most parsimonious model) and Weight is the relative support for the model. The best fitting models were selected as those returning the lowest AICc score and the highest AICc weight and are highlighted in bold.

| <b>Model selection table</b> |                                               |           |               |              |               |                |
|------------------------------|-----------------------------------------------|-----------|---------------|--------------|---------------|----------------|
| <b>Model name</b>            | <b>Remove selection environment effect on</b> | <b>K</b>  | <b>AICc</b>   | <b>Delta</b> | <b>Weight</b> | <b>Log Lik</b> |
| <b>r.mix6</b>                | $E_a + T_h$                                   | <b>15</b> | <b>279.94</b> | <b>0</b>     | <b>0.64</b>   | <b>-123.83</b> |
| <b>r.mix11</b>               | $E_a + E_h + T_h$                             | <b>12</b> | <b>281.84</b> | <b>1.9</b>   | <b>0.25</b>   | <b>-128.19</b> |
| r.mix1                       | $E_a$                                         | 18        | 284.95        | 5.01         | 0.05          | -122.82        |
| r.mix3                       | $T_h$                                         | 18        | 285.45        | 5.51         | 0.04          | -123.07        |
| r.mix7                       | $E_h + T_h$                                   | 15        | 288.51        | 8.57         | 0.01          | -128.11        |
| r.mix15                      | All                                           | 9         | 290.74        | 10.81        | 0             | -135.96        |
| r.mix                        | NA- full model                                | 21        | 291.51        | 11.57        | 0             | -122.49        |
| r.mix8                       | $R(T_c) + E_a$                                | 15        | 293.18        | 13.24        | 0             | -130.45        |
| r.mix12                      | $R(T_c) + E_a + E_h$                          | 12        | 293.77        | 13.83        | 0             | -134.15        |
| r.mix9                       | $R(T_c) + E_h$                                | 15        | 295.98        | 16.05        | 0             | -131.85        |
| r.mix14                      | $R(T_c) + E_h + T_h$                          | 12        | 297.2         | 17.26        | 0             | -135.87        |
| r.mix4                       | $R(T_c)$                                      | 18        | 299.26        | 19.32        | 0             | -129.98        |
| r.mix2                       | $E_h$                                         | 18        | 299.37        | 19.43        | 0             | -130.03        |
| r.mix10                      | $R(T_c) + T_h$                                | 15        | 303.08        | 23.14        | 0             | -135.4         |
| r.mix13                      | $R(T_c) + E_a + T_h$                          | 12        | 306.02        | 26.08        | 0             | -140.28        |
| r.mix5                       | $E_a + E_h$ - no convergence                  |           |               |              |               |                |

| <b>Evolved samples - components of the two best models</b> |           |               |             |              |               |
|------------------------------------------------------------|-----------|---------------|-------------|--------------|---------------|
|                                                            | <b>df</b> | <b>logLik</b> | <b>AICc</b> | <b>Delta</b> | <b>weight</b> |
| r.mix6                                                     | 15        | -123.83       | 279.94      | 0            | 0.72          |
| r.mix11                                                    | 12        | -128.19       | 281.84      | 1.9          | 0.28          |

  

| <b>Parameter estimates for Delta AICc &lt;2</b> |          |            |            |         |          |
|-------------------------------------------------|----------|------------|------------|---------|----------|
|                                                 | $R(T_c)$ | $E_a$ (eV) | $E_h$ (eV) | $T_h$ K | $T_h$ °C |

|                                          |                |             |             |                       |               |
|------------------------------------------|----------------|-------------|-------------|-----------------------|---------------|
| 22 °C                                    | -2.57          | 0.83        | 3.35        | 307.47                | 34.59         |
| 26°C                                     | -3.92          | (no         | 2.66        | (no treatment effect) | (no treatment |
| 32°C                                     | -2.74          | treatment   | 2.93        |                       | effect)       |
| FS                                       | -3.84          | effect)     | 1.74        |                       |               |
| <b>Sum of AIC based relative weights</b> |                |             |             |                       |               |
|                                          | $R(T_c)$       | $E_a$ (eV)  | $E_h$ (eV)  | $T_h$                 |               |
|                                          | 0.99           | 0.05        | 0.73        | 0.05                  |               |
| <b>95% interval</b>                      |                |             |             |                       |               |
|                                          | $R(T_c)$       | $E_a$ (eV)  | $E_h$ (eV)  | $T_h$ K               | $T_h$ °C      |
| 22 °C                                    | [-2.62, -1.38] | [0.71,0.84] | [2.43,4.26] | [305.82,310.5]        | [32.67,37.48] |
| 26°C                                     | [-4.01, -2.09] | ( no        | [0.54,4.78] | (no treatment effect) |               |
| 32°C                                     | [-3.51, -1.54] | treatment   | [0.96,4.87] |                       |               |
| FS                                       | [-3.80, -1.82] | effect)     | [0.26,3.74] |                       |               |

**Table S9 | Model selection to determine the effects of selection regime on the carbon use efficiency.** We fitted the CUE data to a linear mixed model to test whether CUE differed among the selection regimes. Models were compared via the small sample-size corrected Akaike Information Criterion (AICc), delta AICc is the difference in AICc score relative to the model with the lowest value (most parsimonious model) and Weight is the relative support for the model. The best fitting models were selected as those returning the lowest AICc score and the highest AICc weight and are highlighted in bold. The best fitting model included differences in CUE among the selection regimes.

| <b>Model selection table</b>                            |                                                                          |                         |                                               |               |               |              |               |
|---------------------------------------------------------|--------------------------------------------------------------------------|-------------------------|-----------------------------------------------|---------------|---------------|--------------|---------------|
| Formula                                                 | fixed = cue ~ selection regime, random = ~1   selection regime/replicate |                         |                                               |               |               |              |               |
| <b>Model</b>                                            | <b>Intercept</b>                                                         | <b>selection regime</b> | <b>Df</b>                                     | <b>logLik</b> | <b>AICc</b>   | <b>Delta</b> | <b>weight</b> |
| <b>2</b>                                                | <b>0.63</b>                                                              | <b>+</b>                | <b>7</b>                                      | <b>35.84</b>  | <b>-53.70</b> | <b>0.00</b>  | <b>1.00</b>   |
| 1                                                       | 0.68                                                                     |                         | 3                                             | 22.37         | -38.00        | 15.69        | 0.00          |
| <b>Parameter estimates and 95% Confidence intervals</b> |                                                                          |                         |                                               |               |               |              |               |
| <b>Selection regime</b>                                 | <b>Parameter Estimate</b>                                                |                         | <b>95% Confidence interval [lower, upper]</b> |               |               |              |               |
| Ancestor                                                | 0.63                                                                     |                         | [0.59, 0.67]                                  |               |               |              |               |
| 22°C                                                    | 0.71                                                                     |                         | [0.65, 0.77]                                  |               |               |              |               |
| 26°C                                                    | 0.81                                                                     |                         | [0.77, 0.85]                                  |               |               |              |               |
| 32°C                                                    | 0.67                                                                     |                         | [0.61, 0.73]                                  |               |               |              |               |
| FS                                                      | 0.71                                                                     |                         | [0.69, 0.73]                                  |               |               |              |               |

**Table S10| Model selection for the light response curves of photochemical efficiency.**

An exponential decay function (see Eq. (8)) was fitted to the photochemical efficiency ( $\phi_{PSII}$ ) light response curves using a non-linear mixed effects model. “Selection regime” was fitted as a fixed factor to test for differences in the parameters characterizing the light response curves for between the ancestor and the selection regimes. Models were compared via the small sample-size corrected Akaike Information Criterion (AICc), delta AICc is the difference in AICc score relative to the model with the lowest value (most parsimonious model) and Weight is the relative support for the model. The best fitting models were selected as those returning the lowest AICc score and the highest AICc weight and are highlighted in bold.

| <b>Model selection for <math>\phi_{PSII}</math> ancestor populations</b> |          |                                     |                 |               |          |             |
|--------------------------------------------------------------------------|----------|-------------------------------------|-----------------|---------------|----------|-------------|
| Model                                                                    | Df       | Assay temperature effect dropped on | AICc            | Log Lik       | Delta    | Weight      |
| <b>Full</b>                                                              | <b>9</b> |                                     | <b>-1087.66</b> | <b>552.83</b> | <b>0</b> | <b>0.74</b> |
| Exp.mix2                                                                 | 7        | Slope b                             | -956.38         | 485.19        | 131.28   | 0.24        |
| Exp.mix1                                                                 | 7        | Intercept a                         | -695.53         | 354.76        | 392.21   | 0.02        |

  

| <b>Model selection for <math>\phi_{PSII}</math> evolved populations</b> |           |                                    |                 |                 |          |             |
|-------------------------------------------------------------------------|-----------|------------------------------------|-----------------|-----------------|----------|-------------|
| Model                                                                   | Df        | Selection regime effect dropped on | AICc            | LogLik          | Delta    | Weight      |
| <b>Full</b>                                                             | <b>11</b> |                                    | <b>-1554.52</b> | <b>-1512.54</b> | <b>0</b> | <b>0.84</b> |
| Exp.mix1                                                                | 8         | Intercept a                        | -1540.76        | -1510.21        | 13.76    | 0.09        |
| Exp.mix2                                                                | 8         | Slope b                            | -1540.39        | -1509.85        | 14.13    | 0.07        |

  

| <b>Parameter estimates and 95% confidence intervals</b> |          |                                        |
|---------------------------------------------------------|----------|----------------------------------------|
| Selection regime and parameter                          | Estimate | 95% confidence interval [lower, upper] |
| Slope Ancestor (at 22°C)                                | - 0.0013 | [-0.0014, -0.0012]                     |
| Intercept Ancestor (at 22°)                             | 0.51     | [0.49, 0.53]                           |
| Slope Ancestor (at 26°C)                                | - 0.0009 | [-0.001, -0.0008]                      |
| Intercept Ancestor (at 26°C)                            | 0.31     | [0.29, 0.32]                           |
| Slope Ancestor (at 32°C)                                | - 0.0029 | [-0.005, -0.0009]                      |
| Intercept Ancestor (at 32°C)                            | 0.21     | [0.19, 0.23]                           |
| Slope evolved 22°C                                      | -0.0012  | [-0.0014, -0.0010]                     |
| Intercept evolved 22°C                                  | 0.36     | [0.32, 0.40]                           |
| Slope evolved 26°C                                      | -0.0009  | [-0.0011, -0.0007]                     |
| Intercept evolved 26°C                                  | 0.41     | [0.39, 0.43]                           |



---

---

|                           |         |                    |
|---------------------------|---------|--------------------|
| Slope evolved 32°C        | -0.0005 | [-0.0006, -0.0004] |
| Intercept evolved<br>32°C | 0.56    | [0.54, 0.58]       |
| Slope evolved FS          | -0.0008 | [-0.0007, -0.0009] |
| Intercept evolved FS      | 0.46    | [0.44, 0.48]       |

---

**Table S11| Model selection for C:N, C:P, N:P, PPUE, PNUE, Chl:C ratio, size and silicate content, as well as  $\Phi_{PSII}$  at irradiance as in the incubator.** All traits were analyzed using separate mixed effects models, where ‘selection regime’ was a fixed effect and replicate nested within selection regime was a random effect on the intercept. In all traits, there was a significant effect of selection regime. Models were compared via the small sample-size corrected Akaike Information Criterion (AICc), delta AICc is the difference in AICc score relative to the model with the lowest value (most parsimonious model) and Weight is the relative support for the model. The best fitting models were selected as those returning the lowest AICc score and the highest AICc weight and are highlighted in bold.

**Model selections**

| <b>C:N</b>                                                                            |             |                  |          |               |               |          |             |
|---------------------------------------------------------------------------------------|-------------|------------------|----------|---------------|---------------|----------|-------------|
| Global Model: fixed = CN ~ selection regime, random = ~1   selection regime/replicate |             |                  |          |               |               |          |             |
| Model                                                                                 | Intercept   | selection regime | Df       | logLik        | AICc          | delta    | weight      |
| <b>2</b>                                                                              | <b>7.07</b> | <b>+</b>         | <b>7</b> | <b>-76.05</b> | <b>167.50</b> | <b>0</b> | <b>0.99</b> |
| 1                                                                                     | 7.18        |                  | 3        | -88.973       | 183.60        | 16.07    | 0.01        |

| <b>N:P</b>                                                                            |              |                  |          |                |               |          |             |
|---------------------------------------------------------------------------------------|--------------|------------------|----------|----------------|---------------|----------|-------------|
| Global Model: fixed = NP ~ selection regime, random = ~1   selection regime/replicate |              |                  |          |                |               |          |             |
| Model                                                                                 | Intercept    | selection regime | Df       | logLik         | AICc          | delta    | weight      |
| <b>2</b>                                                                              | <b>10.16</b> | <b>+</b>         | <b>7</b> | <b>-195.04</b> | <b>405.40</b> | <b>0</b> | <b>1.00</b> |
| 1                                                                                     | 12.46        |                  | 3        | -209.91        | 426.1         | 20.66    | 0           |

| <b>C:P</b>                                                                            |              |                  |          |                |               |             |             |
|---------------------------------------------------------------------------------------|--------------|------------------|----------|----------------|---------------|-------------|-------------|
| Global Model: fixed = CP ~ selection regime, random = ~1   selection regime/replicate |              |                  |          |                |               |             |             |
| Model                                                                                 | Intercept    | selection regime | Df       | logLik         | AICc          | Delta       | weight      |
| <b>2</b>                                                                              | <b>70.77</b> | <b>+</b>         | <b>7</b> | <b>-393.15</b> | <b>801.70</b> | <b>0.00</b> | <b>1.00</b> |
| 1                                                                                     | 90.72        |                  | 3        | -406.84        | 820           | 18.27       | 0.00        |

| <b>Silicate</b>                                                                       |             |                  |          |               |              |          |             |
|---------------------------------------------------------------------------------------|-------------|------------------|----------|---------------|--------------|----------|-------------|
| Global Model: fixed = Si ~ selection regime, random = ~1   selection regime/replicate |             |                  |          |               |              |          |             |
| Model                                                                                 | Intercept   | selection regime | Df       | logLik        | AICc         | delta    | weight      |
| <b>2</b>                                                                              | <b>0.35</b> | <b>+</b>         | <b>7</b> | <b>-72.67</b> | <b>160.7</b> | <b>0</b> | <b>0.83</b> |
| 1                                                                                     | 0.39        |                  | 3        | -78.78        | 163.8        | 3.14     | 0.17        |

| <b>PPUE</b>                                                                            |           |           |    |        |      |       |        |
|----------------------------------------------------------------------------------------|-----------|-----------|----|--------|------|-------|--------|
| Global Model: fixed =PPUE ~ selection regime, random = ~1   selection regime/replicate |           |           |    |        |      |       |        |
| Model                                                                                  | Intercept | selection | Df | logLik | AICc | delta | weight |

|   |               | regime |   |                |              |          |             |
|---|---------------|--------|---|----------------|--------------|----------|-------------|
| 2 | <b>173.98</b> | +      | 7 | <b>-268.46</b> | <b>513.8</b> | <b>0</b> | <b>0.95</b> |
| 1 | 190.8         |        | 3 | -273.82        | 554.2        | 40.4     | 0.05        |

---

**PNUE**

---

Global Model: fixed = PNUE ~ selection regime, random = ~1 | selection regime/replicate

| Model | Intercept   | selection regime | Df | logLik         | AICc         | delta    | weight      |
|-------|-------------|------------------|----|----------------|--------------|----------|-------------|
| 2     | <b>7.54</b> | +                | 7  | <b>-121.72</b> | <b>260.3</b> | <b>0</b> | <b>0.87</b> |
| 1     | 8.75        |                  | 3  | -128.74        | 264          | 3.73     | 0.13        |

---

**Cell volume**

---

Global Model: fixed = Size ~ selection regime, random = ~1 | selection regime/replicate

| Model | Intercept   | selection regime | Df | logLik          | AICc          | delta    | weight   |
|-------|-------------|------------------|----|-----------------|---------------|----------|----------|
| 2     | <b>3794</b> | +                | 7  | <b>-2032.12</b> | <b>4078.8</b> | <b>0</b> | <b>1</b> |
| 1     | 5776        |                  | 3  | -2048.43        | 4103          | 24.17    | 0        |

---

**Chlorophyll:C ratio**

---

Global Model: fixed = Chl:C ~ selection regime, random = ~1 | selection regime/replicate

| Model | Intercept   | selection regime | Df | logLik        | AICc          | delta    | weight   |
|-------|-------------|------------------|----|---------------|---------------|----------|----------|
| 2     | <b>0.02</b> | +                | 7  | <b>413.58</b> | <b>-812.6</b> | <b>0</b> | <b>1</b> |
| 1     | 0.08        |                  | 3  | 352.88        | -699.6        | 112.95   | 0        |

---

**$\Phi_{PSII}$**

---

Global Model: fixed =  $\Phi_{PSII}$  ~ selection regime, random = ~1 | selection regime/replicate

| Model | Intercept   | selection regime | Df | logLik        | AICc           | delta    | weight      |
|-------|-------------|------------------|----|---------------|----------------|----------|-------------|
| 2     | <b>0.12</b> | +                | 6  | <b>137.86</b> | <b>-263.71</b> | <b>0</b> | <b>0.81</b> |
| 1     | 0.15        |                  | 3  | 124.28        | -242.56        | 21.15    | 0.19        |

---

**Parameter estimates and 95% confidence intervals**

---

**C:N**

| Selection regime | Parameter estimate | 95% Confidence interval [lower, upper] |
|------------------|--------------------|----------------------------------------|
| Ancestor         | 7.07               | [7.02, 7.12]                           |
| 22°C             | 6.94               | [6.82, 7.06]                           |
| 26°C             | 7.08               | [7.07, 7.09]                           |

|      |      |              |
|------|------|--------------|
| 32°C | 7.21 | [7.08, 7.34] |
| FS   | 7.18 | [7.09, 7.27] |

---

**N:P**

| <b>Selection regime</b> | <b>Parameter estimate</b> | <b>95% Confidence interval [lower, upper]</b> |
|-------------------------|---------------------------|-----------------------------------------------|
| Ancestor                | 10.16                     | [9.93, 10.39]                                 |
| 22°C                    | 10.14                     | [9.85, 10.43]                                 |
| 26°C                    | 12.75                     | [12.44, 13.06]                                |
| 32°C                    | 15.07                     | [14.81, 15.33]                                |
| FS                      | 13.21                     | [12.76, 13.66]                                |

---

**C:P**

| <b>Selection regime</b> | <b>Parameter estimate</b> | <b>95% Confidence interval [lower, upper]</b> |
|-------------------------|---------------------------|-----------------------------------------------|
| Ancestor                | 70.78                     | [67.91, 73.65]                                |
| 22°C                    | 69.91                     | [67.16, 72.66]                                |
| 26°C                    | 84.91                     | [82.25, 87.57]                                |
| 32°C                    | 112.93                    | [109.22, 116.64]                              |
| FS                      | 93.22                     | [84.32, 102.12]                               |
| FS                      | 0.202                     | [0.186, 0.218]                                |

---

**Picomol Si per cell**

| <b>Selection regime</b> | <b>Parameter estimate</b> | <b>95% Confidence interval [lower, upper]</b> |
|-------------------------|---------------------------|-----------------------------------------------|
| Ancestor                | 0.353                     | [0.347, 0.359]                                |
| 22°C                    | 0.317                     | [0.314, 0.320]                                |
| 26°C                    | 0.346                     | [0.336, 0.356]                                |
| 32°C                    | 0.168                     | [0.158, 0.178]                                |
| FS                      | 0.311                     | [0.309, 0.313]                                |

---

**PPUE**

| <b>Selection regime</b> | <b>Parameter estimate</b> | <b>95% Confidence interval [lower, upper]</b> |
|-------------------------|---------------------------|-----------------------------------------------|
| Ancestor                | 17.98                     | [13.92, 22.04]                                |
| 22°C                    | 128.16                    | [125.17, 131.15]                              |
| 26°C                    | 180.43                    | [175, 185, 185, 185]                          |
| 32°C                    | 144.98                    | [140.8, 149.16]                               |
| FS                      | 191.04                    | [168.49, 195.59]                              |

---

**PNUE**

| <b>Selection regime</b> | <b>Parameter estimate</b> | <b>95% Confidence interval [lower, upper]</b> |
|-------------------------|---------------------------|-----------------------------------------------|
| Ancestor                | 7.54                      | [7.06, 7.82]                                  |
| 22°C                    | 7.02                      | [6.65, 7.38]                                  |
| 26°C                    | 7.87                      | [7.4, 8.34]                                   |

| 32°C                                    | 5.38                      | [4.9, 5.78]                                   |
|-----------------------------------------|---------------------------|-----------------------------------------------|
| FS                                      | 8.14                      | [7.52, 8.76]                                  |
| <b>Cell volume</b>                      |                           |                                               |
| <b>Selection regime</b>                 | <b>Parameter estimate</b> | <b>95% Confidence interval [lower, upper]</b> |
| Ancestor                                | 3794.25                   | [3113.64, 4474.86]                            |
| 22°C                                    | 3610.65                   | [2821.51, 4399.79]                            |
| 26°C                                    | 6359.75                   | [5541.58, 7177.92]                            |
| 32°C                                    | 8588.82                   | [7895.87, 9281.77]                            |
| FS                                      | 4643.54                   | [3969.93, 5317.15]                            |
| <b>Chlorophyll:C ratio</b>              |                           |                                               |
| <b>Selection regime</b>                 | <b>Parameter estimate</b> | <b>95% Confidence interval [lower, upper]</b> |
| Ancestor                                | 0.024                     | [0.017, 0.031]                                |
| 22°C                                    | 0.071                     | [0.069, 0.073]                                |
| 26°C                                    | 0.121                     | [0.119, 0.123]                                |
| 32°C                                    | 0.088                     | [0.082, 0.094]                                |
| FS                                      | 0.085                     | [0.078, 0.092]                                |
| <b><math>\Phi_{PSII}</math> at Iopt</b> |                           |                                               |
| <b>Selection regime</b>                 | <b>Parameter estimate</b> | <b>95% Confidence interval [lower, upper]</b> |
| Ancestor                                | 0.12                      | [0.119, 0.121]                                |
| 22°C                                    | 0.09                      | [0.082, 0.098]                                |
| 26°C                                    | 0.12                      | [0.112, 0.128]                                |
| 32°C                                    | 0.08                      | [0.073, 0.087]                                |
| FS                                      | 0.12                      | [0.119, 0.121]                                |

**Table S12| PERMANOVA and pairwise comparisons based on treatment-level divergence in single nucleotide polymorphisms.** Using only non-synonymous single nucleotide polymorphisms (SNPs), we quantified the number of sites that acquired mutations in each population relative to the ancestral reference sequence, and from allele frequencies, the genetic distance of each population from the ancestor and the genetic divergence among populations. A distance matrix was then calculated from Euclidean distances and passed to permutational multivariate analysis of variance ( PERMANOVA) to assess overall treatment effects and individual pairwise differences between levels of the treatment were assessed with TukeyHSD tests.

| <b>ANOVA Table</b> |           | <b>SNPs</b> |          |         |             |
|--------------------|-----------|-------------|----------|---------|-------------|
| Response:          | Distances |             |          |         |             |
|                    | Df        | Sum Sq      | Mean Sq  | F value | Pr(>F)      |
| Treatment          | 4         | 0.31587     | 0.078967 | 5.1919  | 0.007097 ** |
| Residuals          | 16        | 0.24335     | 0.01521  |         |             |

  

| <b>Pairwise distances</b> |            |              |              |       |
|---------------------------|------------|--------------|--------------|-------|
| Comparison                | Difference | Lower 95% CI | Upper 95% CI | P     |
| 26-22                     | 0.129      | 0.015        | 0.373        | 0.045 |
| 32-22                     | 0.023      | 0.005        | 0.242        | 0.047 |
| 32-26                     | -0.106     | -0.350       | 0.138        | 0.677 |
| Anc-22                    | -0.469     | -0.877       | -0.061       | 0.021 |
| Anc-26                    | -0.598     | -1.020       | -0.176       | 0.004 |
| Anc-32                    | -0.492     | -0.900       | -0.084       | 0.015 |
| FS-22                     | 0.104      | 0.040        | 0.348        | 0.039 |
| FS-26                     | -0.025     | -0.292       | 0.002        | 0.050 |
| FS-32                     | 0.081      | 0.003        | 0.325        | 0.050 |
| FS-Anc                    | 0.573      | 0.151        | 0.995        | 0.006 |

**Table S13| PERMANOVA and pairwise comparisons based on treatment-level divergence in phenotypic traits.** Phenotypic trait values of a population in its selection environment after 300 generations of evolution were normalised relative to the trait values of the ancestor in that same environment. The traits investigated were gross photosynthesis at saturating light intensity and incubator light intensity, growth and respiration rates, intracellular stoichiometry (ratios and amounts per cell), cell size, chlorophyll content, FRRF data (dark adapted  $F_v/F_m$  at incubator and saturating light intensity, and as a function of light intensity for photosynthetic efficiency, relative rate of electron transport through PSII,  $C$  as the proportion of PSII reaction centres in a closed state, and NPQ as non-photochemical quenching), and flow cytometry data (side scatter for granularity, FL1 fluorescence after a rhodamine dye as a proxy for H<sup>+</sup> transport across mitochondrial membranes, FL2 and FL3 fluorescence after a Nile Red dye as a proxy for intracellular lipid content). The phenotypic trait data were then analysed through calculating a difference matrix and using permutational multivariate analysis of variance (PERMANOVA) to assess overall treatment effects and individual pairwise differences between levels of the treatment were assessed with TukeyHSD tests.

| ANOVA Table        | Phenotype  |              |              |         |           |
|--------------------|------------|--------------|--------------|---------|-----------|
| Response:          | Distances  |              |              |         |           |
|                    | Df         | Sum Sq       | Mean Sq      | F value | Pr(>F)    |
| Treatment          | 4          | 3.3427       | 0.83568      | 3.3174  | 0.03075 * |
| Residuals          | 20         | 5.0382       | 0.25191      |         |           |
| ---                |            |              |              |         |           |
| Pairwise distances |            |              |              |         |           |
| Comparison         | Difference | Lower 95% CI | Upper 95% CI | P       |           |
| 26-22              | 0.69       | 0.17         | 1.56         | 0.051   |           |
| 32-22              | 0.38       | 0.19         | 1.25         | 0.049   |           |
| Anc-22             | -1.04      | -2.66        | -0.28        | 0.034   |           |
| FS-22              | 0.39       | 0.18         | 1.25         | 0.047   |           |
| 32-26              | -0.31      | -1.18        | -0.15        | 0.048   |           |
| Anc-26             | -1.73      | -3.35        | -0.11        | 0.033   |           |
| FS-26              | -0.31      | -1.17        | 0.56         | 0.827   |           |
| Anc-32             | -1.42      | -3.04        | -0.20        | 0.010   |           |
| FS-32              | 0.01       | -0.86        | 0.88         | 0.100   |           |
| FS-Anc             | 1.43       | 0.82         | 3.05         | 0.020   |           |

**Table S14| Table of genes where SNPs were the most strongly associated with treatment. The top 20 loadings were pulled from a SNP based PCA where treatments had been found to cluster differently.** aGene denotes the gene name (accessible through NCBI), “from component” denotes whether the gene was pulled from the first (comp1) or second (comp2) principal component. Associated with treatment denotes the selection regime that the gene was the most strongly associated with. Function gives an overview of the function if known and ‘other’, additional information on the gene and its putative functions. Gene functions were sourced from UniProt and NCBI.

| Gene accession code | From component | Associated with treatment | Function                                                                                                                            | Additional information                                                                  |
|---------------------|----------------|---------------------------|-------------------------------------------------------------------------------------------------------------------------------------|-----------------------------------------------------------------------------------------|
| THAPSDRAFT_23994    | comp1          | FS                        | Thiol-dependent ubiquitinyl hydrolase activity                                                                                      | uncharacterised, function inferred from homology                                        |
| RPT5.1              | comp2          | 32                        | 26S proteasome ATPase regulatory subunit                                                                                            | Positive regulation of RNA polymerase II transcriptional preinitiation complex assembly |
| THAPSDRAFT_5389.1   | comp2          | 26                        | Alpha-1,3-glucosyltransferase,This protein is involved in the pathway protein glycosylation, which is part of Protein modification. | function inferred from homology                                                         |
| THAPSDRAFT_5001.1   | comp2          | FS                        | ATP binding                                                                                                                         | uncharacterised, function inferred from homology                                        |
| THAPSDRAFT_bd1378   | comp1          | 26                        | ATP synthase subunit a, chloroplastic                                                                                               | function inferred from homology                                                         |
| THAPSDRAFT_11712    | comp1          | 26                        | uncharacterised transmembrane protein                                                                                               | unknown                                                                                 |
| THAPSDRAFT_bd1563   | comp1          | 32                        | ATP synthase subunit beta                                                                                                           | Produces ATP from ADP in the presence of a proton gradient across the membrane.         |
| THAPSDRAFT_bd1318   | comp1          | 32                        | ATP synthase subunits                                                                                                               | Produces ATP from ADP in the presence of a proton gradient across the membrane.         |
| THAPSDRAFT_264016   | comp1          | 26                        | Calcium transporting rt-atpase                                                                                                      | ATP binding function has been inferred from homology                                    |
| THAPSDRAFT_21124    | comp1          | 26                        | unknown                                                                                                                             | unknown                                                                                 |
| THAPSDRAFT_bd1611   | comp1          | 22                        | Chlorophyll binding                                                                                                                 | function inferred from homology                                                         |
| THAPSDRAFT_bd1439   | comp1          | 32                        | Chloroplast component                                                                                                               | uncharacterised, function inferred from homology                                        |
| THAPSDRAFT_11407    | comp1          | 26                        | unknown                                                                                                                             | unknown                                                                                 |
| THAPSDRAFT_bd2063   | comp1          | FS                        | Chloroplast component                                                                                                               | uncharacterised, function inferred from homology                                        |
| THAPSDRAFT_bd1441   | comp1          | 32                        | Cytochrome c biogenesis protein                                                                                                     | Required during biogenesis of c-type cytochromes                                        |



|                    |       |    |                                                                                                                                    |                                                                                                                               |
|--------------------|-------|----|------------------------------------------------------------------------------------------------------------------------------------|-------------------------------------------------------------------------------------------------------------------------------|
|                    |       |    | CcsA                                                                                                                               | (cytochrome c6 and cytochrome f) at the step of heme attachment, inferred from homologies                                     |
| THAPSDRAFT_4075    | comp2 | 32 | DNA binding                                                                                                                        | uncharacterised, function inferred from homology                                                                              |
| THAPSDRAFT_bd997   | comp1 | 32 | DNA-dependent RNA polymerase                                                                                                       | catalyses the transcription of DNA into RNA using the four ribonucleoside triphosphates as substrates                         |
| THAPSDRAFT_21370   | comp1 | 26 | unknown                                                                                                                            | unknown                                                                                                                       |
| THAPSDRAFT_bd1267  | comp1 | 26 | DNA-dependent RNA polymerase catalyses the transcription of DNA into RNA using the four ribonucleoside triphosphates as substrates | Inferred from homologues                                                                                                      |
| THAPSDRAFT_bd2050  | comp1 | 32 | DNA-dependent RNA polymerase, second subunit                                                                                       | catalyzes the transcription of DNA into RNA using the four ribonucleoside triphosphates as substrates                         |
| THAPSDRAFT_2462.1  | comp2 | 26 | unknown                                                                                                                            | unknown                                                                                                                       |
| THAPSDRAFT_4767.1  | comp2 | 26 | unknown                                                                                                                            | unknown                                                                                                                       |
| THAPSDRAFT_bd846.1 | comp2 | 26 | unknown                                                                                                                            | unknown                                                                                                                       |
| THAPSDRAFT_8190.1  | comp2 | 26 | unknown                                                                                                                            | unknown                                                                                                                       |
| THAPSDRAFT_bd1736  | comp1 | 26 | Electron transporter, transferring electrons within the cyclic electron transport pathway of photosynthesis activity               | function inferred from homology                                                                                               |
| THAPSDRAFT_22706   | comp1 | 26 | Endonuclease                                                                                                                       | function inferred from homology                                                                                               |
| THAPSDRAFT_bd1258  | comp1 | FS | Ferredoxin                                                                                                                         | Iron-sulphur proteins that transfer electrons in a wide variety of metabolic reactions, e.g. electron chain in photosynthesis |
| THAPS_25392        | comp1 | 26 | Hypothetical integral component of membrane                                                                                        | details unknown                                                                                                               |
| THAPSDRAFT_2049    | comp1 | 26 | Hyrdrolase acticity                                                                                                                | function inferred from homology                                                                                               |
| THAPSDRAFT_4495.1  | comp2 | 32 | Integral membrane component                                                                                                        | uncharacterised, function inferred from homology                                                                              |
| THAPSDRAFT_37979.1 | comp2 | 32 | Iron-sulphur cluster assembly                                                                                                      | uncharacterised, function inferred from homology                                                                              |
| THAPSDRAFT_867     | comp1 | 32 | unknown                                                                                                                            | unknown                                                                                                                       |
| THAPSDRAFT_2407    | comp1 | 32 | unknown                                                                                                                            | unknown                                                                                                                       |

|                     |       |    |                                                                 |                                                                                                                                     |
|---------------------|-------|----|-----------------------------------------------------------------|-------------------------------------------------------------------------------------------------------------------------------------|
| THAPSDRAFT_bd1360   | comp1 | 22 | Iron-sulphur cluster formation ABC transporter, plastid protein | function inferred from homology                                                                                                     |
| THAPSDRAFT_7957.1   | comp2 | 32 | unknown                                                         | unknown                                                                                                                             |
| THAPSDRAFT_4573.1   | comp2 | 32 | unknown                                                         | unknown                                                                                                                             |
| THAPSDRAFT_7448.1   | comp2 | 32 | unknown                                                         | unknown                                                                                                                             |
| THAPSDRAFT_7815.1   | comp2 | 32 | unknown                                                         | unknown                                                                                                                             |
| THAPSDRAFT_34293.1  | comp2 | 32 | Metal ion binding, pre-mRNA binding                             | uncharacterised, function inferred from homology                                                                                    |
| THAPSDRAFT_7696.1   | comp2 | 32 | unknown                                                         | unknown                                                                                                                             |
| THAPSDRAFT_9243.1   | comp2 | 32 | unknown                                                         | unknown                                                                                                                             |
| THAPS_6723.1        | comp2 | 32 | unknown                                                         | unknown                                                                                                                             |
| THAPSDRAFT_bd980    | comp1 | FS | Mg-protoporphyrin IX chelatase                                  | Involved in chlorophyll biosynthesis. Catalyzes the insertion of magnesium ion into protoporphyrin IX to yield Mg-protoporphyrin IX |
| THAPSDRAFT_23775.1  | comp2 | 32 | unknown                                                         | unknown                                                                                                                             |
| THAPSDRAFT_3141.1   | comp2 | 32 | unknown                                                         | unknown                                                                                                                             |
| THAPSDRAFT_9591.1   | comp2 | 32 | unknown                                                         | unknown                                                                                                                             |
| THAPSDRAFT_2441.1   | comp2 | 32 | unknown                                                         | unknown                                                                                                                             |
| THAPSDRAFT_264303.1 | comp2 | 32 | unknown                                                         | unknown                                                                                                                             |
| THAPS_263324        | comp2 | 32 | unknown                                                         | unknown                                                                                                                             |
| THAPSDRAFT_bd705    | comp2 | 32 | unknown                                                         | unknown                                                                                                                             |
| THAPSDRAFT_2244.1   | comp2 | 32 | unknown                                                         | unknown                                                                                                                             |
| THAPSDRAFT_8234     | comp1 | FS | Nucleic acid binding                                            | uncharacterised, function inferred from homology                                                                                    |
| THAPSDRAFT_11408    | comp1 | FS | Nucleic acid binding                                            | uncharacterised, function inferred from homology                                                                                    |
| THAPSDRAFT_8715.1   | comp2 | 32 | unknown                                                         | unknown                                                                                                                             |
| THAPSDRAFT_33926.1  | comp2 | 32 | Obtusifoliol 14-alpha demethylase                               | iron-binding, also CH3 transferase, function inferred from homology                                                                 |
| THAPSDRAFT_bd1013   | comp1 | 26 | Peroxidase                                                      | function inferred from homology                                                                                                     |
| THAPSDRAFT_264058.  | comp2 | 32 | Phosphatase 2A (PP2A) regulatory                                | calcium ion binding, function inferred from homology                                                                                |

|                    |       |    |                                              |                                                                                                                                                                        |
|--------------------|-------|----|----------------------------------------------|------------------------------------------------------------------------------------------------------------------------------------------------------------------------|
| 1                  |       |    | subunit B-like protein-like protein          |                                                                                                                                                                        |
| THAPS_6819.1       | comp2 | 32 | Phospholipid biosynthetic process            | uncharacterised, function inferred from homology                                                                                                                       |
| THAPSDRAFT_943     | comp2 | 32 | unknown                                      | unknown                                                                                                                                                                |
| THAPSDRAFT_bd1545  | comp1 | 26 | Photosystem II CP43 reaction center protein  | One of the components of the core complex of photosystem II (PSII). It binds chlorophyll and helps catalyze the primary light-induced photochemical processes of PSII. |
| THAPSDRAFT_bd1327  | comp1 | 32 | Replicative DNA helicase                     | DNA replication. In the process, it makes ADP and phosphate from ATP and H2O. ATP binding properties                                                                   |
| THAPSDRAFT_bd1911  | comp1 | 22 | Ribosomal protein                            | RNA binding, known function                                                                                                                                            |
| THAPSDRAFT_bd1447  | comp1 | 26 | Ribosomal protein, RNA binding               | function inferred from homology                                                                                                                                        |
| THAPSDRAFT_bd2088  | comp1 | FS | Ribulose biphosphate carboxylase large chain |                                                                                                                                                                        |
| THAPS_6735.1       | comp2 | 32 | unknown                                      | unknown                                                                                                                                                                |
| THAPSDRAFT_6456.1  | comp2 | 32 | unknown                                      | unknown                                                                                                                                                                |
| THAPSDRAFT_6600.1  | comp2 | 32 | RNA binding                                  | uncharacterised, function inferred from homology                                                                                                                       |
| THAPS_35239        | comp1 | 26 | RNA binding, mRNA splicing                   | function inferred from homology                                                                                                                                        |
| THAPS_6656.1       | comp2 | 32 | RNA binding, mRNA splicing                   | uncharacterised, function inferred from homology                                                                                                                       |
| THAPSDRAFT_31035.1 | comp2 | 22 | Serine-type endopeptidase activity           | uncharacterised, function inferred from homology                                                                                                                       |
| THAPSDRAFT_19465.1 | comp2 | 32 | Thioredoxin-disulfide reductase activity     | Catalyses NADP to NADPH reactions, function inferred from homology                                                                                                     |
| THAPSDRAFT_268574  | comp2 | 32 | Tim22-like protein, protein channel          | Protein localisation to organelle, function inferred from homology                                                                                                     |
| THAPSDRAFT_24862   | comp1 | FS | unknown                                      | unknown                                                                                                                                                                |
| THAPSDRAFT_6004    | comp1 | FS | unknown                                      | unknown                                                                                                                                                                |
| THAPSDRAFT_267946  | comp2 | 32 | transferase activity                         | uncharacterised, function inferred from homology                                                                                                                       |
| THAPSDRAFT_24873   | comp1 | FS | unknown                                      | unknown                                                                                                                                                                |
| THAPSDRAFT_7790    | comp1 | 26 | Transmembrane protein                        | details unknown                                                                                                                                                        |
| THAPSDRAFT_bd93    | comp1 | FS | Transmembrane protein                        | uncharacterised, function inferred from homology                                                                                                                       |
| THAPSDRAFT_10699   | comp1 | FS | unknown                                      | unknown                                                                                                                                                                |

|                    |       |    |                                                     |                                                  |
|--------------------|-------|----|-----------------------------------------------------|--------------------------------------------------|
| THAPSDRAFT_17859.1 | comp2 | 32 | Transmembrane protein in<br>endoplasmatic reticulum | uncharacterised, function inferred from homology |
|--------------------|-------|----|-----------------------------------------------------|--------------------------------------------------|

---

**Table 15: Aligned sequence depths for each sequenced population.** After trimming and filtering, remaining sequence reads were then aligned against version 2 of the reference *T. pseudonana* genome sequence (GenBank: GCA\_000149405.2) using BWA-mem version 0.7.5a-2 with default settings . This resulted in average aligned sequence depths from 3.4 to 74.5 X; the average alignment depth for the t0 (ancestor) sample was 18.5 X. This resulted in a set of 64 BAM-formatted files. Depths and insert lengths were calculated using Qualimap.

| Population name | Mean aligned sequence depth (X) | Accession number                 | Mapping quality mean | Median insert length (b.p.) |
|-----------------|---------------------------------|----------------------------------|----------------------|-----------------------------|
| t0_S45          | 18.46                           | To be added once granted by NCBI | 57.47                | 317.0                       |
| t300_22_b1_S19  | 18.39                           |                                  | 57.54                | 281.0                       |
| t300_22_b2_S20  | 18.61                           |                                  | 57.48                | 339.0                       |
| t300_22_b3_S21  | 17.66                           |                                  | 57.6                 | 259.0                       |
| t300_22_b4_S22  | 17.57                           |                                  | 57.61                | 229.0                       |
| t300_22_b5_S23  | 18.52                           |                                  | 57.45                | 333.0                       |
| t300_22_b6_S24  | 18.29                           |                                  | 57.58                | 274.0                       |
| t300_26_b1_S25  | 18.65                           |                                  | 52.83                | 345.0                       |
| t300_26_b2_S26  | 6.67                            |                                  | 57.63                | 170.0                       |
| t300_26_b3_S27  | 15.02                           |                                  | 57.72                | 109.0                       |
| t300_26_b4_S28  | 15.25                           |                                  | 57.59                | 120.0                       |
| t300_26_b5_S29  | 18.71                           |                                  | 57.48                | 353.0                       |
| t300_26_b6_S14  | 18.61                           |                                  | 57.38                | 439.0                       |
| t300_32_b1_S3   | 18.65                           |                                  | 57.53                | 431.0                       |
| t300_32_b2_S4   | 18.75                           |                                  | 57.35                | 502.0                       |
| t300_32_b3_S5   | 18.68                           |                                  | 57.45                | 489.0                       |
| t300_32_b4_S10  | 18.58                           |                                  | 57.38                | 441.0                       |
| t300_32_b5_S9   | 18.41                           |                                  | 57.4                 | 391.0                       |
| t300_32_b6_S8   | 18.28                           |                                  | 57.35                | 348.0                       |
| t300_FL_b1_S37  | 6.45                            |                                  | 57.32                | 55.0                        |
| t300_FL_b2_S18  | 18.62                           |                                  | 57.41                | 418.0                       |
| t300_FL_b3_S19  | 18.49                           |                                  | 57.42                | 365.0                       |
| t300_FL_b4_S20  | 18.64                           |                                  | 57.46                | 334.0                       |
| t300_FL_b5_S21  | 18.59                           |                                  | 57.38                | 400.0                       |
| t300_FL_b6_S22  | 18.63                           |                                  | 57.37                | 409.0                       |
| t300_FS_b1_S31  | 8.71                            |                                  | 57.51                | 276.0                       |
| t300_FS_b2_S7   | 18.62                           |                                  | 57.39                | 426.0                       |
| t300_FS_b3_S33  | 7.11                            |                                  | 57.42                | 307.0                       |
| t300_FS_b4_S6   | 18.74                           |                                  | 57.36                | 509.0                       |

|                |       |
|----------------|-------|
| t300_FS_b5_S35 | 15.83 |
| t300_FS_b6_S36 | 18.62 |

|       |
|-------|
| 57.45 |
| 57.5  |

|       |
|-------|
| 319.0 |
| 290.0 |
